# Supplementary material
Source: Springer Nature journal article supplement (https://www.springermedizin.de/resource/supplementary/12885_2013_5283_MOESM29_ESM.pdf/9465620)
Supplement: MOESM29 [file 9465620]

Potentially relevant articles identified through MEDLINE (N=1629) and EMBASE (N=270) on August 21st, 2012

Duplicates excluded (N=194)

1476 studies excluded based on title and abstract review

Exclusion criteria

- non-original data (e.g. reviews, editorials, guidelines, comments)
- non-clinical articles (e.g. technical, animal or *in vitro* studies)
- case reports
- articles investigating other tissues than breast tissue
- articles not written in English

Articles retrieved for full text review (N=229)

104 studies excluded based on full text review

Exclusion criteria

- only lymph node or distant metastases investigated (N=10)
- target was not assessed using IHC (N=64)
- (non-defined part of) patients received neo-adjuvant therapy (N=10)
- no prevalence reported or could not be derived from published data (N=20)

Cross references (N=2)

Articles included in review (N=127)

Suspected patient overlap or tissue types not distinguishable (N=10)

Articles used for analysis (N=117)

CAIX (N=25)

CAIX + GLUT1 (N=10)  
+ IGF1R (N=1)

GLUT1 (N=22)

IGF1R (N=31)

CXCR4 (N=28)
